# Supplementary material
Source: PubMed Central journal article supplement (PMC3043121)
Supplement: NIHMS250491-supplement-01.pdf [file NIHMS250491-supplement-01.pdf]

Supplemental Table. *In vivo* phosphorylation sites on brain VGSCs and KGKCs identified by phosphoproteomic approaches

**VOLTAGE-GATED SODIUM CHANNEL SUBUNITS**

|                      |               |                 |                |                |  |
|----------------------|---------------|-----------------|----------------|----------------|--|
| <b>Nav1.1/Scn1a</b>  | W: A2APX6/mus | B: P04774-1/rat | Tr: A2APX6/mus |                |  |
| ID I-II              | T465          |                 |                |                |  |
| ID I-II              | S467          |                 |                |                |  |
| ID I-II              |               | S470            |                |                |  |
| ID I-II              | S551          | S551            |                |                |  |
| ID I-II              |               |                 | S565           |                |  |
| ID I-II              | S607          | S607            |                |                |  |
| ID I-II              | S620          |                 |                |                |  |
| ID I-II              | T710          |                 |                |                |  |
| ID I-II              | T712          |                 |                |                |  |
| ID I-II              | S719          |                 |                |                |  |
| C-term               |               |                 | S1928          |                |  |
| <b>Nav1.2/Scn2a1</b> | W: B1AWN6/mus | B: P04775-1/rat | T: B1AWN6/mus  | Tr: A2AJZ2/mus |  |
| N-term               |               | S4              |                |                |  |
| ID I-II              | S468          | S468            |                |                |  |
| ID I-II              | S471          | S471            |                |                |  |
| ID I-II              | S475          |                 |                |                |  |
| ID I-II              | S484          | S484            |                |                |  |
| ID I-II              | S486          | S486            |                |                |  |
| ID I-II              | S488          |                 |                |                |  |
| ID I-II              | S526          |                 |                |                |  |
| ID I-II              | S528          | S528            |                |                |  |
| ID I-II              |               |                 | S540           | S540           |  |
| ID I-II              | S554          | S554            |                |                |  |
| ID I-II              | S558          |                 |                |                |  |
| ID I-II              | S561          |                 |                |                |  |
| ID I-II              |               |                 |                | S568           |  |
| ID I-II              | S573          |                 |                |                |  |
| ID I-II              | S576          |                 |                |                |  |
| ID I-II              |               | S579            | S579           | S579           |  |
| ID I-II              | S610          | S610            |                |                |  |
| ID I-II              | S623          | S623            |                |                |  |
| ID I-II              | S626          |                 |                |                |  |
| ID I-II              |               | S687            |                |                |  |
| ID I-II              |               | S688            |                |                |  |
| ID I-II              | T713          |                 |                |                |  |
| ID I-II              | T715          |                 |                |                |  |
| ID I-II              | S722          | S721            |                |                |  |
| C-term               |               | S1930           |                |                |  |
| C-term               | T1944         |                 |                |                |  |
| C-term               |               | T1966           |                |                |  |
| C-term               |               | S1971           |                |                |  |
| <b>Nav1.6/Scn8a</b>  | W: Q9WTU3/mus |                 |                |                |  |
| ID I-II              | S504          |                 |                |                |  |
| ID I-II              | S518          |                 |                |                |  |
| ID I-II              | S520          |                 |                |                |  |
| ID I-II              | S522          |                 |                |                |  |
| ID I-II              | S600          |                 |                |                |  |
| <b>Nav1.9/Scn9a</b>  | W: Q62205/mus |                 |                |                |  |
| ID I-II              | S502          |                 |                |                |  |
| ID I-II              | S504          |                 |                |                |  |
| ID II-III            | S1062         |                 |                |                |  |
| ID II-III            | S1064         |                 |                |                |  |
| <b>Navβ2/Scn2b</b>   | W: Q56A07/mus |                 |                |                |  |
| C-term               | S192          |                 |                |                |  |
| C-term               | T193          |                 |                |                |  |
| <b>Navβ3/Scn3b</b>   | W: Q69ZQ3/mus |                 |                |                |  |
| C-term               | S249          |                 |                |                |  |

**VOLTAGE-GATED POTASSIUM CHANNEL SUBUNITS**

|                    |               |                |                |               |                |
|--------------------|---------------|----------------|----------------|---------------|----------------|
| <b>Kv1.1/Kcna1</b> | W: P16388     |                |                |               |                |
| N-term             | S23           |                |                |               |                |
| <b>Kv1.2/Kcna2</b> | W: P63141/mus | Yg: P63142/rat | M: P63141/mus  | T: P63141/mus | B: P63141/mus  |
| C-term             |               |                | T421           |               |                |
| C-term             |               |                |                |               | Y429           |
| C-term             |               |                | T433           |               |                |
| C-term             | S434          | S434           |                | S434          |                |
| C-term             | S440          | S440           |                |               |                |
| C-term             | S441          | S441           |                | S441          |                |
| C-term             | S447          |                |                |               |                |
| C-term             |               | S449           |                |               |                |
| <b>Kv1.4/Kcna4</b> | W: Q61423/mus | M: Q61423/mus  | Tr:Q8CBF8/mus  |               |                |
| N-term             | S101          |                |                |               |                |
| N-term             | S113          |                |                |               |                |
| N-term             | S122          | S122           | S122           |               |                |
| <b>Kv1.5/Kcna5</b> | W: Q61762/mus |                |                |               |                |
| C-term             | S535          |                |                |               |                |
| <b>Kv1.6/Kcna6</b> | W: Q61923/mus | M: Q61923/mus  |                |               |                |
| N-term             | S6            |                |                |               |                |
| N-term             | T8            | T8             |                |               |                |
| <b>Kvβ1/Kcnab1</b> | T: Q9D5E9/mus | Tr: P63143/mus |                |               |                |
| Core               |               | S145/S146      |                |               |                |
| C-term             | S395          |                |                |               |                |
| <b>Kvβ2/Kcnab2</b> | W: P62482     | M: P62482      | Tr: A2A8L3/mus | B: P62482/mus | C: Q64284/mus  |
| N-term             | S9            | S9             | S9             |               |                |
| N-term             | S14           |                |                |               |                |
| N-term             | T18           |                | T18            |               |                |
| N-term             | S20           |                |                | S20           | S20            |
| N-term             |               |                |                | Y25           |                |
| Core               | S111          |                | S111/S112      |               |                |
| Core               | S112          |                | S111/S112      |               |                |
| C-term             |               |                |                | Y360          |                |
| <b>Kv2.1/Kcnb1</b> | W: Q8K0D1/mus | P: P15387/rat  | M: Q8K0D1/mus  | T: Q8K0D1/mus | TR: Q03717/mus |
| N-term             |               |                | S12            |               |                |
| N-term             |               | S15            |                |               | S15            |
| C-term             | S444          |                |                |               |                |
| C-term             |               | S457           |                |               |                |
| C-term             | S484          | S484           |                |               |                |
| C-term             |               | S496           |                |               |                |
| C-term             |               | S503           |                |               |                |
| C-term             | S517          |                |                |               |                |
| C-term             | S518          |                |                |               |                |
| C-term             | S519          |                |                |               |                |
| C-term             | S520          | S520           |                |               |                |
| C-term             |               | S541           |                |               |                |
| C-term             | S567          | S567           |                |               |                |
| C-term             |               | S590           |                |               |                |
| C-term             |               | S607           |                |               |                |
| C-term             | S655          | S655           | S655           | S655          | S655           |
| C-term             |               | S719           |                |               |                |
| C-term             |               | S771           |                |               |                |
| C-term             | S782          |                |                |               |                |
| C-term             |               | S799           |                |               |                |
| C-term             | T803          |                |                | T803          |                |
| C-term             | S804          | S804           |                | S804          |                |
| C-term             |               | T836           |                |               |                |
| <b>Kv2.2/Kcnb2</b> | W: A6H8H5     |                |                |               |                |
| C-term             | T478          |                |                |               |                |
| C-term             | S481          |                |                |               |                |
| C-term             | S488          |                |                |               |                |
| C-term             | S490          |                |                |               |                |
| C-term             | S503          |                |                |               |                |
| C-term             | S507          |                |                |               |                |
| C-term             | S530          |                |                |               |                |

|                      |                  |                  |                  |                    |                    |
|----------------------|------------------|------------------|------------------|--------------------|--------------------|
| <b>Kv3.1/Kcnc1</b>   | W: P15388        | T: P15388        | Tr: Q3TR92/mus   |                    |                    |
| N-term               | S158             |                  |                  |                    |                    |
| N-term               | S160             | S160             |                  |                    |                    |
| C-term               |                  |                  | T421             |                    |                    |
| C-term               | S468             |                  |                  |                    |                    |
| C-term               | T483             |                  |                  |                    |                    |
| <b>Kv3.2/Kcnc2</b>   | W: P70311        |                  |                  |                    |                    |
| C-term               | S509             |                  |                  |                    |                    |
| C-term               | S557             |                  |                  |                    |                    |
| C-term               | S604             |                  |                  |                    |                    |
| C-term               | S619             |                  |                  |                    |                    |
| <b>Kv3.3/Kcnc3</b>   | W: Q63959        | Tr: Q63959       |                  |                    |                    |
| C-term               | S717             | S717             |                  |                    |                    |
| C-term               | S732             |                  |                  |                    |                    |
| C-term               | S740             |                  |                  |                    |                    |
| C-term               | T751             |                  |                  |                    |                    |
| C-term               | S755             |                  |                  |                    |                    |
| <b>Kv3.4/Kcnc4</b>   | W: Q8R1C0/mus    |                  |                  |                    |                    |
| C-term               | S555             |                  |                  |                    |                    |
| <b>Kv4.1/Kcnd1</b>   | W: Q03719        |                  |                  |                    |                    |
| C-term               | S460             |                  |                  |                    |                    |
| C-term               | S555             |                  |                  |                    |                    |
| <b>Kv4.2/Kcnd2</b>   | W: Q9Z0V2/mus    | S: Q63881/rat    | M: Q9Z0V2/mus    | T: Q9Z0V2/mus      |                    |
| N-term               | T154             |                  |                  |                    |                    |
| C-term               | S548             | S548             | S548             |                    |                    |
| C-term               | S552             | S552             |                  | S552               |                    |
| C-term               |                  | S572             |                  |                    |                    |
| C-term               |                  | S575             |                  |                    |                    |
| <b>Kv4.3/Kcnd3</b>   | W: Q9Z0V1/mus    |                  |                  |                    |                    |
| N-term               | S153             |                  |                  |                    |                    |
| <b>KChIP2/Kcnip2</b> | W: Q3YAB2/mus    | T: Q3YAB2        |                  |                    |                    |
| N-term               | S9               |                  |                  |                    |                    |
| N-term               | S19              | S19              |                  |                    |                    |
| N-term               | S76              |                  |                  |                    |                    |
| <b>KChIP3/Kcnip3</b> | W: Q9QXT8/mus    |                  |                  |                    |                    |
| N-term               | S65              |                  |                  |                    |                    |
| <b>Kv7.2/Kcng2</b>   | W: NP_034741/mus | M: NP_034741/mus | T: NP_034741/mus | Tr: NP_034741/mus  | Surti:O43526/human |
| N-term               | S52              |                  |                  |                    |                    |
| S4-S5 linker         |                  |                  |                  |                    | T217               |
| C-term               | S352             |                  | S352             |                    |                    |
| C-term               | S457             |                  |                  |                    |                    |
| C-term               | T462             |                  |                  |                    |                    |
| C-term               | S466             | S466             |                  |                    |                    |
| C-term               | S468             | S468             |                  |                    |                    |
| C-term               | S476             |                  |                  |                    |                    |
| C-term               |                  |                  | S485             |                    |                    |
| C-term               | S507             |                  |                  | S507               |                    |
| C-term               | Y671             |                  |                  |                    |                    |
| C-term               | S673             |                  |                  | S673               |                    |
| C-term               | T728             |                  |                  |                    |                    |
| C-term               | S729             |                  |                  |                    |                    |
| C-term               | S799             |                  |                  |                    |                    |
| C-term               | S801             |                  |                  |                    |                    |
| <b>Kv7.3/Kcng3</b>   | W: Q8K3F6/mus    | M: Q8K3F6/mus    | Tr: Q14B66       | Surti:O43526/human |                    |
| N-term               | T82              |                  |                  |                    |                    |
| S4-S5 linker         |                  |                  |                  | T246               |                    |
| C-term               | S579             |                  |                  |                    |                    |
| C-term               | T580             |                  | T577             |                    |                    |
| C-term               | S596             |                  |                  |                    |                    |
| C-term               | S599             | S599             |                  |                    |                    |
| <b>Kv7.5/Kcng5</b>   | W: Q9JK45/mus    |                  |                  |                    |                    |
| C-term               | S469             |                  |                  |                    |                    |
| C-term               | S477             |                  |                  |                    |                    |

| Slo1 BK/Kcnma1                                 | W: Q08460-1/mus | W: Q08460-2/mus | Y: Q62976-2/rat | M: Q08460-1/mus | T: Q08460-1/mus | T: Q08460-2/mus |
|------------------------------------------------|-----------------|-----------------|-----------------|-----------------|-----------------|-----------------|
| S0-S1 linker                                   |                 |                 | S106            | S136            |                 |                 |
| S0-S1 linker                                   |                 |                 | S107            |                 |                 |                 |
| C-term                                         |                 |                 | S551            |                 |                 |                 |
| C-term                                         | T709            | T670            | T676            |                 |                 |                 |
| C-term                                         | S711            | S672            | S678            | S711            | S711            | S672            |
| C-term                                         |                 |                 | S691            |                 |                 |                 |
| C-term                                         |                 |                 | T694            |                 |                 |                 |
| C-term                                         |                 |                 | S695            |                 |                 |                 |
| C-term                                         |                 |                 | S813            |                 |                 |                 |
| C-term                                         |                 |                 | S818            |                 |                 |                 |
| C-term                                         |                 |                 | S879            |                 |                 |                 |
| C-term                                         |                 |                 | T883            |                 |                 |                 |
| C-term                                         |                 | S884            | S890            |                 | S923            |                 |
| C-term                                         |                 | S885            | S891            |                 | S924            |                 |
| C-term                                         |                 |                 | S895            |                 | S928            |                 |
| C-term                                         | S938            |                 | S905            |                 |                 |                 |
| C-term                                         |                 |                 |                 |                 |                 |                 |
| C-term                                         |                 | T995            | T1001           | T1061           | T1061           |                 |
| C-term                                         |                 | T998            |                 |                 |                 |                 |
| C-term                                         |                 |                 | S1059           |                 |                 |                 |
| C-term                                         |                 |                 | S1101           |                 |                 |                 |
| C-term                                         |                 |                 | S1106           |                 |                 |                 |
| C-term                                         |                 |                 | S1112           |                 |                 |                 |
| C-term                                         |                 |                 | S1113           |                 |                 |                 |
| C-term                                         |                 |                 | S1116           |                 |                 |                 |
| C-term                                         |                 |                 | S1117           |                 |                 |                 |
| C-term                                         |                 |                 | S1118           |                 |                 |                 |
| C-term                                         |                 |                 | S1121           |                 |                 |                 |
| C-term                                         |                 |                 | S1124           |                 |                 |                 |
| C-term                                         |                 |                 | T1125           |                 |                 |                 |
| Splice-variants specific sites from Yan et al. |                 |                 |                 |                 |                 |                 |
| N-term                                         | rat             | S12             | Q62976-1        |                 |                 |                 |
| N-term                                         | rat             | S27             | Q62976-1        |                 |                 |                 |
| C-term                                         | rat             | T742            | Q62976-4        |                 |                 |                 |
| C-term                                         | rat             | S753            | Q62976-4        |                 |                 |                 |
| C-term                                         | rat             | S962            | Q62976-1        |                 |                 |                 |
| C-term                                         | rat             | S1177           | Q62976-3        |                 |                 |                 |
| C-term                                         | rat             | S1178           | Q62976-3        |                 |                 |                 |

B: Ballif et al., 2008  
 C: Collins et al., 2005  
 M: Munton et al., 2007  
 P: Park et al., 2006  
 S: Seikel et al., 2008  
 T: Tweedie-Cullen et al., 2009  
 Tr: Trinidad et al., 2008  
 W: Wisniewski et al., 2010  
 Y: Yan et al., 2008  
 Yg: Yang et al., 2007
